# Supplementary material for: Ultrafast photoisomerization mechanism of azaborine revealed by nonadiabatic molecular dynamics simulations
Source: Royal Society of Chemistry journal article supplement (doi:10.1039/d3cp01169k), 2023-01-01
Supplement: d3cp01169k1.pdf [file d3cp01169k1.pdf]

## Supplementary Information

### Ultrafast Photoisomerization Mechanism of Azaborine Revealed by Nonadiabatic Molecular Dynamics Simulation

Sangmin Jeong,<sup>a</sup> Eunji Park,<sup>b</sup> Joonghan Kim<sup>b,\*</sup> and Kyung Hwan Kim<sup>a,\*</sup>

<sup>a</sup>Department of Chemistry, POSTECH, Pohang, 37673, Republic of Korea. E-mail: kimkyunghwan@postech.ac.kr

<sup>b</sup>Department of Chemistry, The Catholic University of Korea, Bucheon, 14662, Republic of Korea. E-mail: joonghankim@catholic.ac.kr

\*Corresponding author

E-mail: joonghankim@catholic.ac.kr, kimkyunghwan@postech.ac.kr

### S1. Active orbitals of azaborine in the SA3-CAS(6,6) calculation

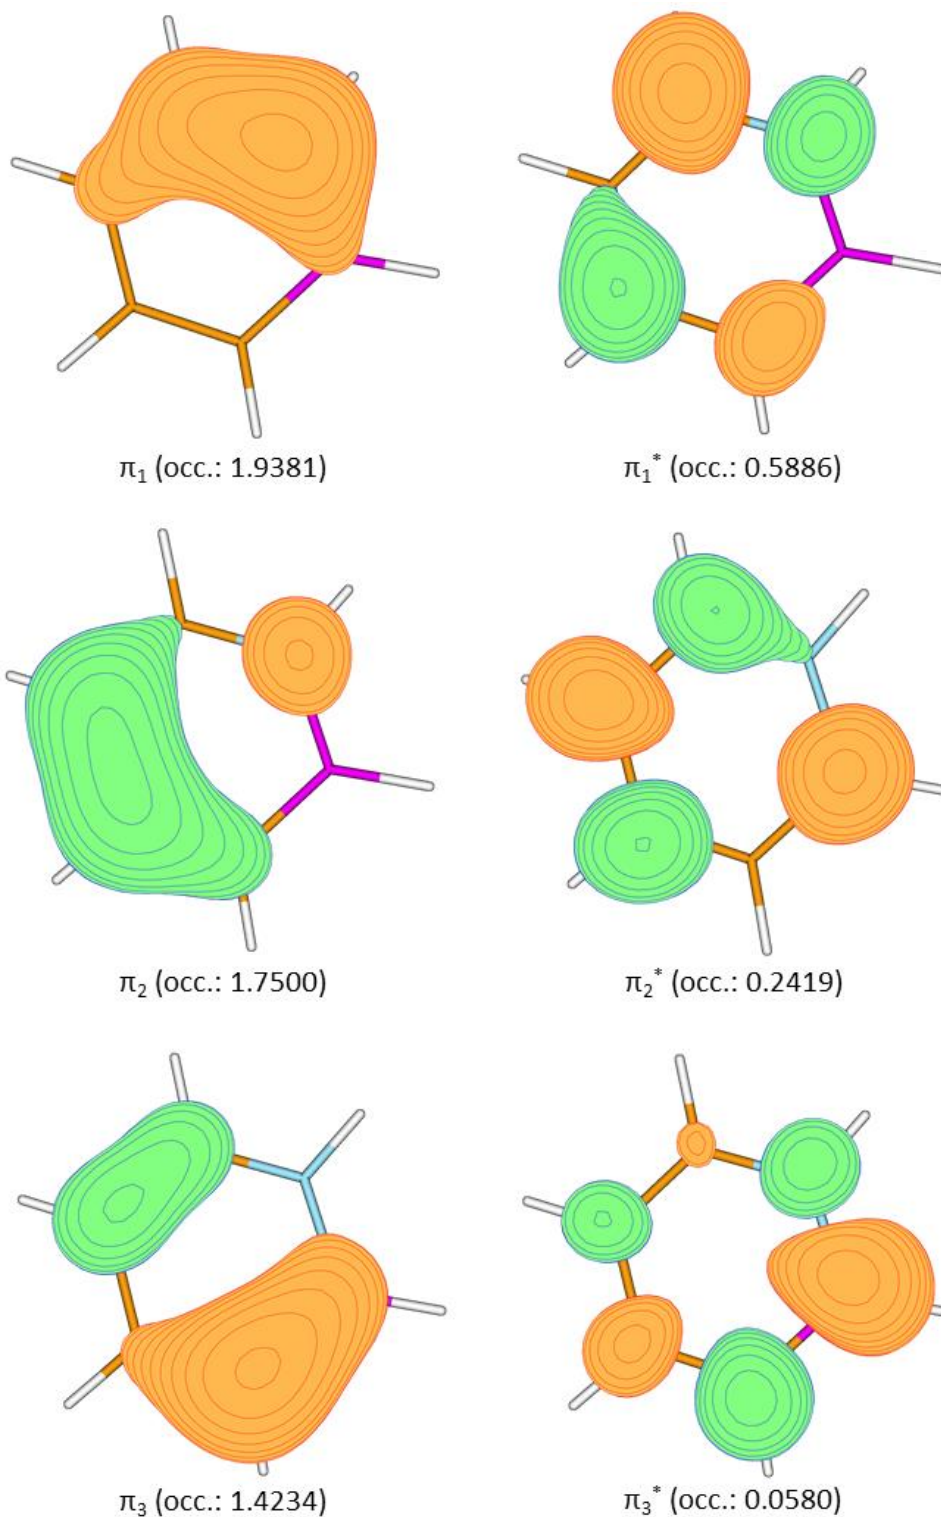

**Fig S1.** Active orbitals of azaborine in the planar structure, calculated with SA3-CAS(6,6)/ANO-RCC-VDZP level of theory. The molecular structure was optimized using  $\omega$ B97XD/6-311++G(d,p). Orange, white, purple, and light blue sticks correspond to C, H, B, and N atoms, respectively.

## S2. Sampling the initial trajectories for the TSH dynamics simulation

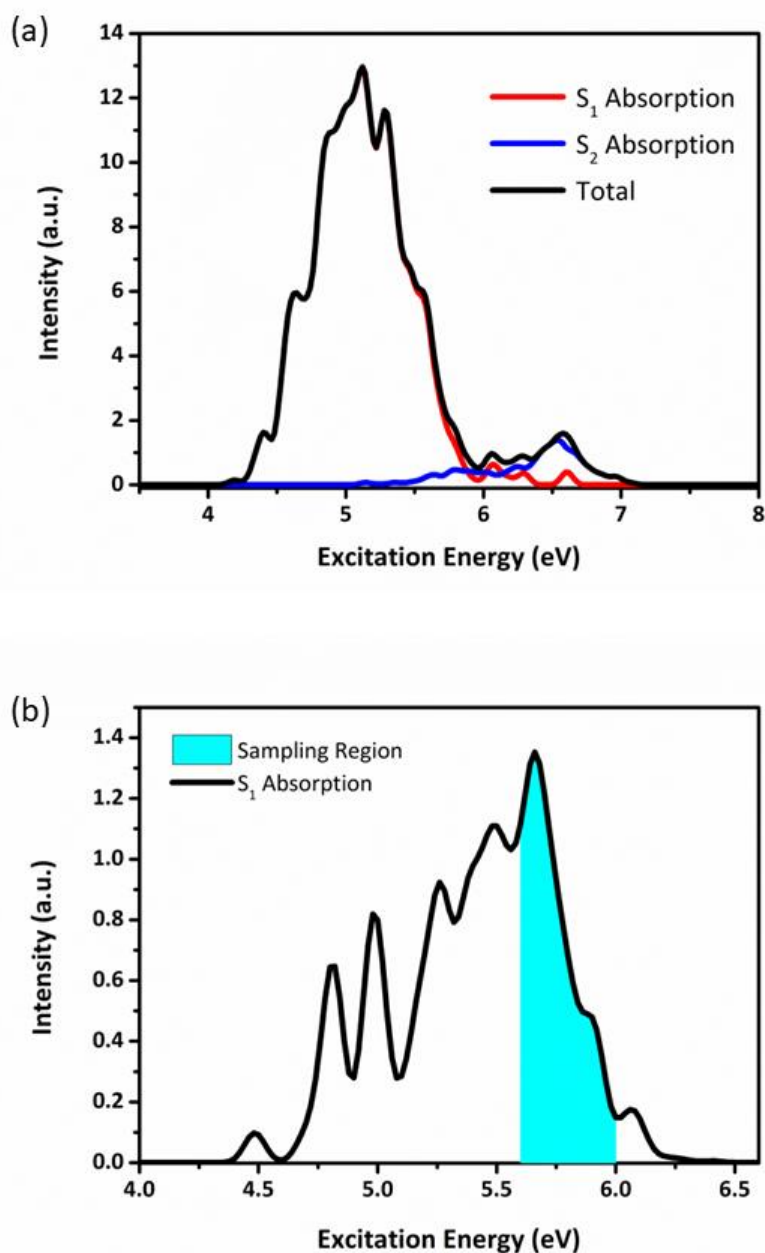

**Fig S2.** (a) Absorption spectrum (black) of azaborine calculated by the initial Wigner sampling with MS-CASPT2/ANO-RCC-VDZP level. Contributions both from  $S_0 \rightarrow S_1$  excitation (red)  $S_0 \rightarrow S_2$  excitation (blue) are considered. (b) Absorption spectrum (black) of azaborine calculated by the initial Wigner sampling with SA3-CAS(6,6)/ANO-RCC-VDZP level. Contribution only from  $S_0 \rightarrow S_1$  excitation is used here. The excitation window from 5.6 eV to 6.0 eV indicated in cyan was selected for further simulations.

**Table S1.** The vertical transition energies ( $T_{\text{v}}$ s) in eV and the oscillator strengths (in parentheses) of  $S_0 \rightarrow S_1$  and  $S_0 \rightarrow S_2$  transitions calculated using the five different level of theory. For complete active space methods, the weights of each excitation character and their coefficients (in square brackets) are also noted.

| $T_{\text{v}}$ ( $f_{\text{osc}}$ ) | SA3-CAS(6,6)/<br>ANO-RCC-VDZP | SA3-CAS(6,6)/<br>ANO-RCC-VTZP | MS-CASPT2/<br>ANO-RCC-VDZP    | MS-CASPT2/<br>ANO-RCC-VTZP    | EOM-CCSD/<br>6-311++G(d,p)    |
|-------------------------------------|-------------------------------|-------------------------------|-------------------------------|-------------------------------|-------------------------------|
| $S_0 \rightarrow S_1$               | 5.50 eV (0.1155)              | 5.46 eV (0.1189)              | 4.74 eV (0.1413)              | 4.57 eV (0.1423)              | 5.16 eV (0.1631)              |
|                                     | $\pi_3 \rightarrow \pi_4$ 29% | $\pi_3 \rightarrow \pi_4$ 31% | $\pi_3 \rightarrow \pi_4$ 50% | $\pi_3 \rightarrow \pi_4$ 52% | $\pi_3 \rightarrow \pi_4$ 80% |
|                                     | [-0.5404]                     | [-0.5528]                     | [-0.7038]                     | [-0.7245]                     |                               |
|                                     | $\pi_3 \rightarrow \pi_5$ 22% | $\pi_3 \rightarrow \pi_5$ 21% | $\pi_3 \rightarrow \pi_5$ 12% | $\pi_3 \rightarrow \pi_5$ 11% |                               |
|                                     | [0.4656]                      | [0.4584]                      | [0.3500]                      | [0.3300]                      |                               |
|                                     | $\pi_2 \rightarrow \pi_4$ 18% | $\pi_2 \rightarrow \pi_4$ 18% | $\pi_2 \rightarrow \pi_4$ 10% | $\pi_2 \rightarrow \pi_4$ 9%  |                               |
|                                     | [0.4270]                      | [-0.4250]                     | [0.3156]                      | [-0.3010]                     |                               |
| $S_0 \rightarrow S_2$               | 7.01 eV (0.0597)              | 6.93 eV (0.0617)              | 6.36 eV (0.0155)              | 6.16 eV (0.0132)              | 6.34 eV (0.0838)              |
|                                     | $\pi_3 \rightarrow \pi_4$ 39% | $\pi_3 \rightarrow \pi_4$ 39% | $\pi_3 \rightarrow \pi_4$ 23% | $\pi_3 \rightarrow \pi_4$ 21% | $\pi_3 \rightarrow \pi_5$ 72% |
|                                     | [-0.6289]                     | [-0.6256]                     | [-0.4768]                     | [-0.4565]                     |                               |
|                                     | $\pi_3 \rightarrow \pi_5$ 15% | $\pi_3 \rightarrow \pi_5$ 16% | $\pi_3 \rightarrow \pi_5$ 25% | $\pi_3 \rightarrow \pi_5$ 26% | $\pi_2 \rightarrow \pi_4$ 13% |
|                                     | [-0.3915]                     | [-0.3999]                     | [-0.4973]                     | [-0.5112]                     |                               |
|                                     | $\pi_2 \rightarrow \pi_4$ 15% | $\pi_2 \rightarrow \pi_4$ 16% | $\pi_2 \rightarrow \pi_4$ 24% | $\pi_2 \rightarrow \pi_4$ 25% |                               |
|                                     | [-0.3909]                     | [0.3993]                      | [-0.4865]                     | [0.4998]                      |                               |

Based the calculation result with MS-CASPT2/ANO-RCC-VDZP level, we could conclude that the contribution from  $S_0 \rightarrow S_2$  transition is negligible under our simulation condition (See Table S1 and Fig S2(a)). Thus, only the  $S_1$  state was set as the initial electronic state for all our simulations. The initial states in the 5.6 eV to 6.0 eV excitation window, shown in cyan color in Fig S2, were selected for further simulations. This sampling criterion is consistent with the condition in the previous experimental study.<sup>1</sup> They used 253.7 nm light for excitation, while the peak of the absorption spectrum of azaborine is at around 269 nm.<sup>1</sup>

### S3. Time evolution of important geometry parameters for hydrogen dissociation pathway

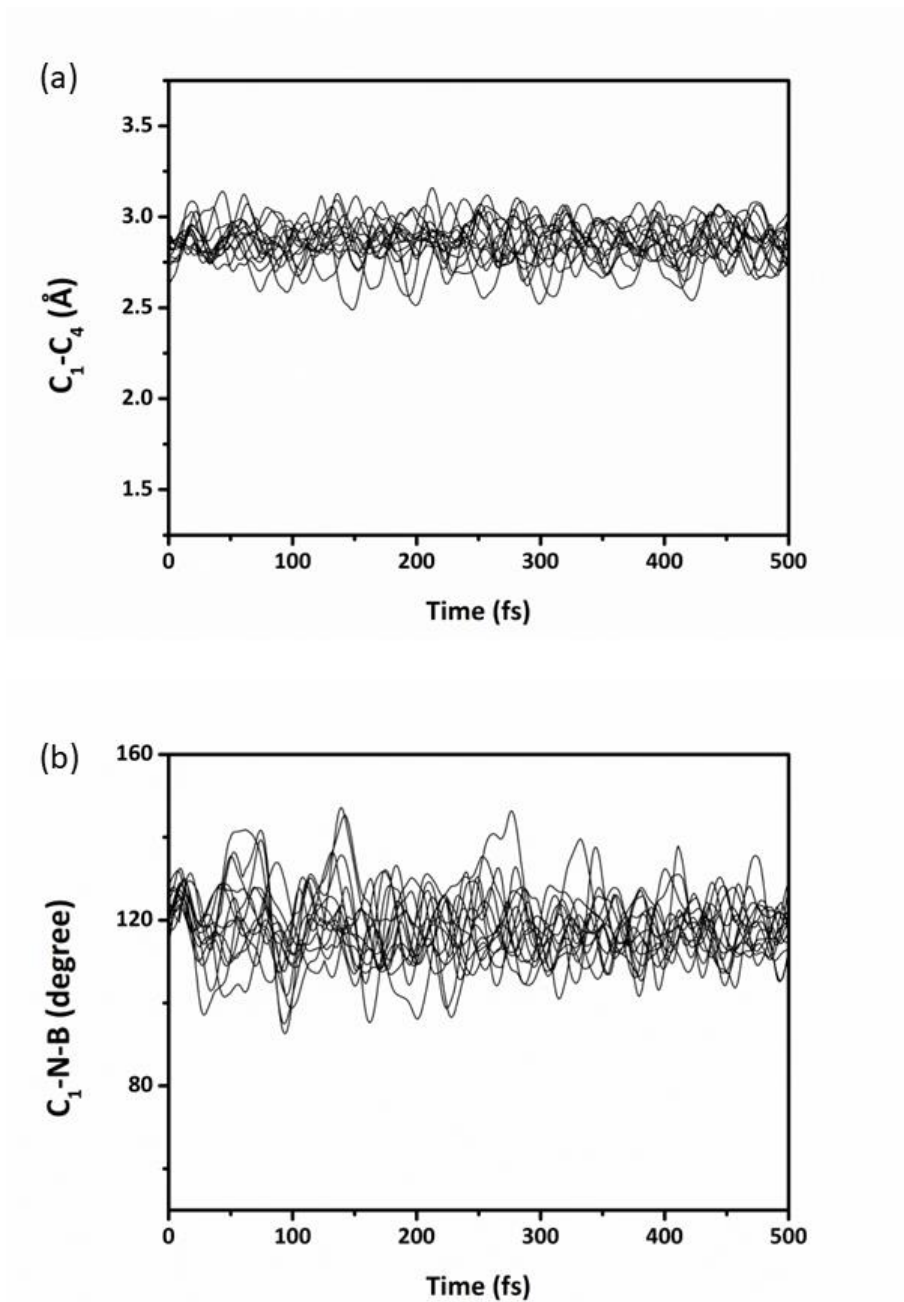

**Fig S3.** Ensemble plots for (a) C<sub>1</sub>-C<sub>4</sub> distance and (b) C<sub>1</sub>-N-B angle of trajectories that exhibit hydrogen dissociation.

#### S4. The second excited state of azaborine

We performed the geometry optimization starting from the FC region of the  $S_2$  state to investigate its decay pathway of the  $S_2$  state. Geometry optimization follows the ring puckering mode but could not find any stable local minima, due to the near degenerated region of  $S_2/S_1$ . At the end point of the geometry optimization, we perform the conical intersection optimization between the  $S_2$  and  $S_1$  states, which led to the  $S_2/S_1$  MECP geometry without having any barrier between the FC region of  $S_2$  and  $S_2/S_1$  MECP. Similar to benzene,<sup>2</sup> the  $S_2$  state of azaborine has a downward gradient at the FC region toward the Dewar-like distortion, and meets the  $S_1$  state with a small displacement. Fig S4 shows the optimized structure at the  $S_2/S_1$  MECP, together with the gradient difference vector (GDV) and the derivative coupling vector (DCV).

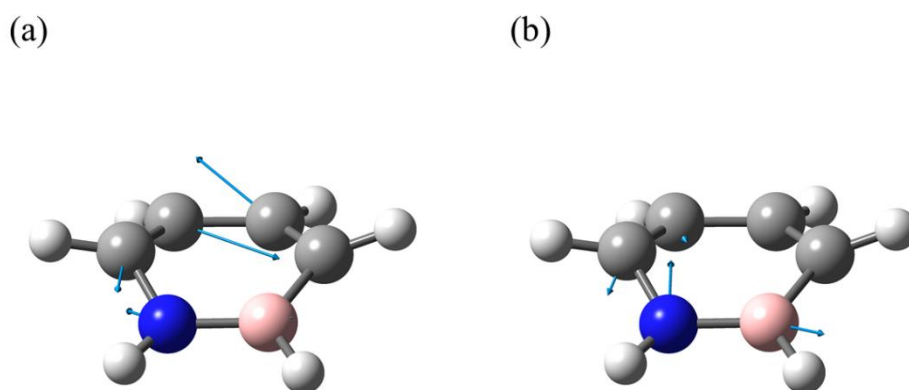

**Fig S4.** (a) GDV and (b) DCV are shown on the optimized  $S_2/S_1$  MECP structure.

The energy gap between  $S_1$  and  $S_2$  of azaborine, estimated to be 1.5~1.6 eV according to Table S1 in all levels of theory, is smaller than that of benzene.<sup>2</sup> This small energy gap allows the two excited states to cross at the position close to the FC region, indicating that the  $S_2/S_1$  MECP is barrierlessly connected to the FC region in the  $S_2$  state. The small gap also explains the small population of the  $S_2$  state at an early time in the simulation shown in Fig 1.

To find the relaxation pathway from the  $S_2$  to the  $S_1$  state, we introduced a slight perturbation of about 1 GDV to the  $S_2/S_1$  MECP geometry and performed the geometry optimization in the  $S_1$  state starting from this structure. This calculation also yields the region of near-degenerate energy between the  $S_1$  and  $S_0$  states, and we further optimized the MECP geometry between the  $S_1$  and  $S_0$  states. This calculation shows that the  $S_2/S_1$  MECP is directly linked to the  $S_1/S_0$  MECP. It indicates that unlike benzene,<sup>2</sup> the population in the  $S_2$  state can undergo a decay process similar to the population in the  $S_1$  state, suggesting that the initial  $S_1 \rightarrow S_2$  transition in some of our trajectories does not have a significant effect.

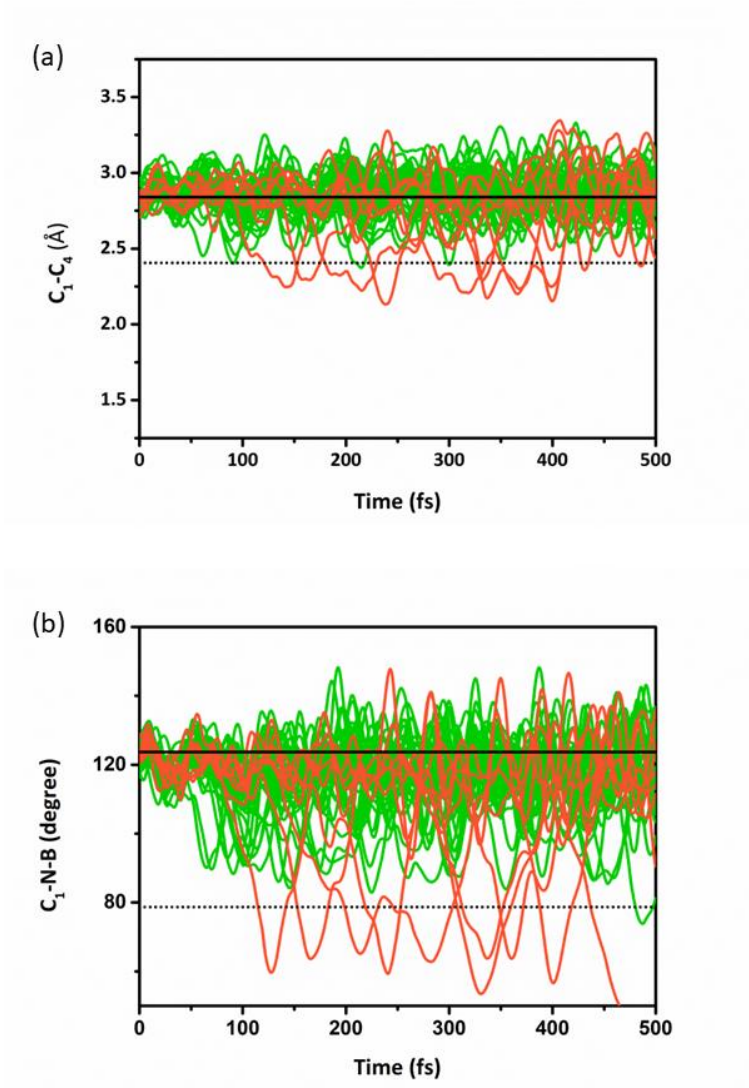

**Fig S5.** Ensemble plots for (a) C<sub>1</sub>-C<sub>4</sub> bond distance and (b) C<sub>1</sub>-N-B angle of the that involve the initial S<sub>1</sub>→S<sub>2</sub> transition. The green and orange lines indicate the trajectories in path 1 and path 2, respectively. Representative geometric values from the planar reactant and prefulvene-like intermediate are indicated by solid and dotted horizontal lines. Atom indexing and geometrical parameters used in (a) and (b) are the same as the given in Fig 3.

## S5. The representative plot of the dissociative pathway and the ring reformation path

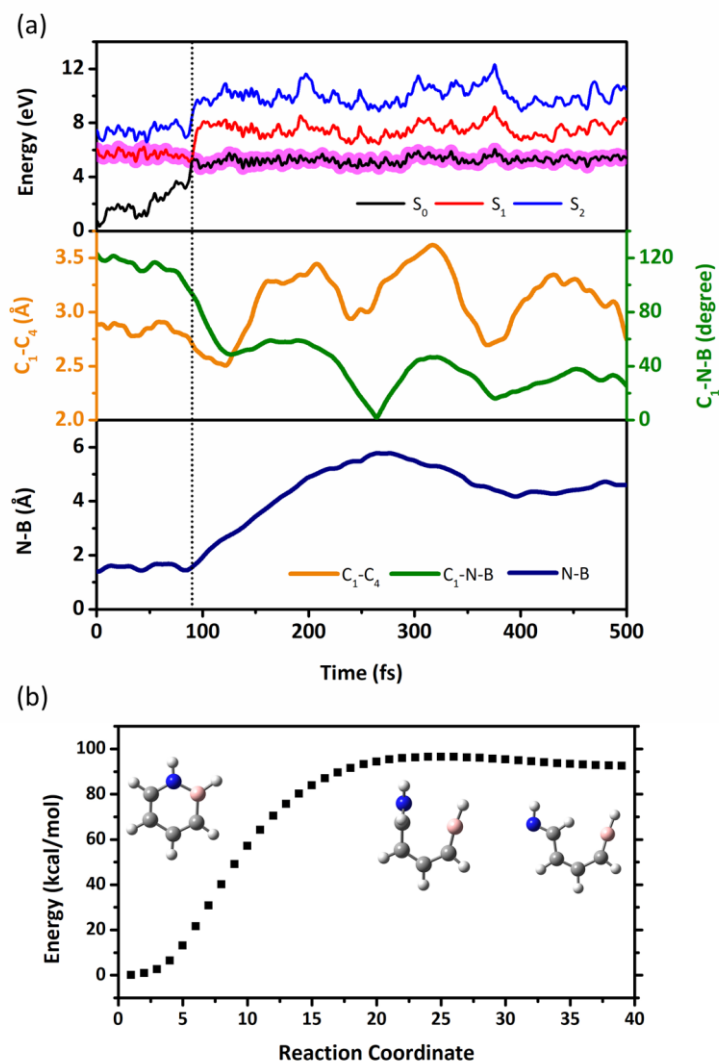

**Fig S6.** (a) Time-energy plot with geometry parameters of a representative trajectory of the pathway with B–N bond dissociation, and (b) reaction coordinate from the B–N dissociation chain to the planar ring form.

We calculated the relative energy following the reaction coordinate between the chain structure and the planar structure as shown in Fig S6. Since the energy barrier from the chain form to the planar form is very small, we expect that this dissociative trajectory can easily restore the ring structure.



## S6. Theoretical estimation of photoconversion in continuous irradiation

Based on the quantum yield obtained from our NAMD simulation, the photoconversion rate and the total conversion time have been roughly estimated. We first calculated the absorption cross section of the molecule based on the excitation energy and the oscillator strength by using the following equation.<sup>3</sup>

$$\sigma = \pi e^2 / 2mc\epsilon_0 (f_{osc} g(E - \Delta E_0, \delta)), g(E - \Delta E_0, \delta) = \hbar / (\delta \sqrt{2\pi}) * \exp(-(E - \Delta E_0)^2 / 2\delta^2)$$

The obtained absorption cross section then allows us to calculate the probability of the absorption event from a single photon irradiation as follows.

$$A = \epsilon bc = \sigma N_A / (\ln(10) * 10^3) * b * c, T = 10^{-A}$$

Since some values of experimental parameters from the previous study such as the Hg lamp power and the molarity of the system are limited, we used approximate values by assuming reasonable experimental conditions. Our assumptions include a system consisting of 60  $\mu\text{M}$  of azaborine, a 1:1000 ratio of azaborine to neon, inside a 1 cm cubic box, and being irradiated with 253.7 nm UV light with a power density of 0.1 mW/cm<sup>2</sup>. We then simply calculated the time that is needed for the full conversion as follows.

$$\text{Prob} = (\text{Power density}(W/cm^2)) * (\text{Number of photons in 1 W of 253.7 nm light}) * (1 - T) \\ * (2 \text{ traj} / 82 \text{ traj}) = 0.0025 \% / s$$

$$(\text{Portion of isomer}) = \text{Prob} * t, \quad t_{full \text{ conversion}} = 1 / \text{Prob} = 3.4 * 10^4 \text{ s}$$

In our rough estimation, full photoconversion of azaborine can happen within about 570 min. It qualitatively showed that full conversion can be achieved within a reasonable time, which is consistent with the experimental observation even with a low quantum yield estimated from our simulation.

## S7. XYZ coordinates of the optimized structures

### Planar structure ( $S_0$ minimum) optimized by $\omega$ B97XD/6-311++G(d,p)

|   |             |             |             |
|---|-------------|-------------|-------------|
| C | 1.05776700  | -0.84978400 | 0.00003300  |
| C | -1.18102700 | 0.87994000  | 0.00005000  |
| C | -1.32610500 | -0.48144400 | 0.00000400  |
| C | -0.20414400 | -1.35727900 | 0.00002600  |
| H | 1.93360500  | -1.48846300 | -0.00026200 |
| H | 2.23562700  | 0.79066200  | -0.00003400 |
| H | 0.51616300  | 2.62041600  | -0.00025100 |
| H | -2.07910100 | 1.49022800  | -0.00002900 |
| H | -2.31532900 | -0.93380200 | -0.00019300 |
| H | -0.34234000 | -2.43075000 | -0.00011600 |
| B | 0.21510900  | 1.46476600  | -0.00002100 |
| N | 1.27098400  | 0.49704000  | 0.00004400  |

### Prefulvene-like structure optimized by $\omega$ B97XD/6-311++G(d,p)

|   |             |             |             |
|---|-------------|-------------|-------------|
| C | 0.58832800  | -0.64649700 | 0.50826600  |
| C | -0.72025500 | 1.15577400  | 0.04382900  |
| C | -1.50877900 | -0.04396500 | -0.13977600 |
| C | -0.72274000 | -1.12350100 | 0.01657500  |
| H | 0.86257900  | -0.69177200 | 1.56265600  |
| H | 2.42295200  | -0.24424200 | -0.18583700 |
| H | 1.51999200  | 1.88658300  | 0.30288400  |
| H | -1.19797700 | 2.08227000  | 0.35883200  |
| H | -2.54188200 | -0.04629300 | -0.47248500 |
| H | -0.86908500 | -2.12739900 | -0.36281200 |
| B | 0.75970200  | 1.04705600  | -0.07264600 |
| N | 1.45508400  | -0.30646900 | -0.48762400 |

**Dewar structure optimized by  $\omega$ B97XD/6-311++G(d,p)**

|   |             |             |             |
|---|-------------|-------------|-------------|
| C | -0.06545600 | 0.68112700  | 0.55455000  |
| C | 0.09630900  | -0.87955500 | 0.49799200  |
| C | 1.36430700  | -0.57448000 | -0.28246400 |
| C | 1.21630700  | 0.75355200  | -0.25953200 |
| H | -0.12297300 | 1.21231000  | 1.50558900  |
| H | -1.84561100 | 1.36593500  | -0.58732400 |
| H | -2.03706200 | -1.54383800 | -0.87242700 |
| H | 0.17894000  | -1.46355100 | 1.41474000  |
| H | 2.09650300  | -1.23127600 | -0.73884000 |
| H | 1.75115800  | 1.57970000  | -0.71197500 |
| B | -1.28427400 | -0.79517900 | -0.33193400 |
| N | -1.32405500 | 0.59610700  | -0.20191000 |

**Chain structure optimized by  $\omega$ B97XD/6-311++G(d,p)**

|   |             |             |             |
|---|-------------|-------------|-------------|
| C | 1.16494700  | -0.27044100 | 0.07484300  |
| C | -1.86221700 | -0.04513100 | 0.02767800  |
| C | -0.91168000 | 1.05979600  | -0.01357100 |
| C | 0.43140200  | 0.97910700  | -0.00981500 |
| H | 0.55955800  | -1.17395800 | 0.28157000  |
| H | 2.75949800  | -1.29400300 | 0.05356400  |
| H | -1.62175300 | -2.58834200 | -0.13980600 |
| H | -2.91348500 | 0.23809400  | 0.12130700  |
| H | -1.34999100 | 2.05216400  | -0.06097400 |
| H | 1.03088400  | 1.88063300  | -0.06510700 |
| B | -1.68097400 | -1.41948700 | -0.05643500 |
| N | 2.42934900  | -0.33673400 | -0.05474100 |

**TS between Chain and Planar structure optimized by  $\omega$ B97XD/6-311++G(d,p)**

|   |             |             |             |
|---|-------------|-------------|-------------|
| C | -1.13709600 | -0.18726600 | 0.41828500  |
| C | 1.60201800  | 0.44599900  | 0.02561200  |
| C | 1.11215900  | -0.92024700 | -0.12383900 |
| C | -0.18151200 | -1.23714400 | 0.01277300  |
| H | -1.12325800 | 0.08263500  | 1.48639400  |
| H | -2.47094800 | 1.09956900  | 0.05106500  |
| H | 0.32554500  | 2.66739700  | -0.06296000 |
| H | 2.67661500  | 0.58481800  | 0.14772500  |
| H | 1.83002900  | -1.69002400 | -0.39033200 |
| H | -0.55492100 | -2.23603400 | -0.18188900 |
| B | 0.83987400  | 1.61452300  | -0.02106600 |
| N | -1.89369200 | 0.40156600  | -0.42023800 |

**Minimum energy crossing point (MECP) between  $S_2$  and  $S_1$  optimized by SA3-CAS(6,6)/6-311++G(d,p)**

|   |             |             |             |
|---|-------------|-------------|-------------|
| C | -0.63277415 | -1.16512333 | 0.29970247  |
| C | 0.72422924  | 1.26232215  | 0.24350732  |
| C | -0.75595696 | 1.27861525  | 0.14282717  |
| C | -1.46185558 | 0.05024109  | 0.13060949  |
| H | -1.09181293 | -2.11745689 | 0.48784091  |
| H | 1.00040794  | -2.07262957 | -0.57018491 |
| H | 2.60356825  | -0.09037946 | -0.50721034 |
| H | 1.21828462  | 2.13368111  | 0.63406955  |
| H | -1.27410976 | 2.20125800  | -0.05333212 |
| H | -2.46490388 | -0.01992488 | -0.25224836 |
| B | 1.45002580  | -0.02138553 | -0.21984880 |
| N | 0.63365540  | -1.18512094 | -0.30965338 |

## References

1. A. Chrostowska, S. Xu, A. N. Lamm, A. Mazière, C. D. Weber, A. Dargelos, P. Baylère, A. Graciaa and S.-Y. Liu, *J. Am. Chem. Soc.*, 2012, **134**, 10279-10285.
2. I. J. Palmer, I. N. Ragazos, F. Bernardi, M. Olivucci and M. A. Robb, *J. Am. Chem. Soc.*, 1993, **115**, 673-682.
3. M. Barbatti, A. J. A. Aquino and H. Lischka, *Phys. Chem. Chem. Phys.*, 2010, **12**, 4959-4967.
